# Supplementary material for: Inhibition of bromodomain and extra‐terminal proteins increases sensitivity to venetoclax in chronic lymphocytic leukaemia
Source: PubMed Central journal article supplement (PMC6991693; doi:10.1111/jcmm.14857), 2019-12-10
Supplement: JCMM-24-1650-s001.pdf [file JCMM-24-1650-s001.pdf]

## SUPPLEMENTARY FIGURES

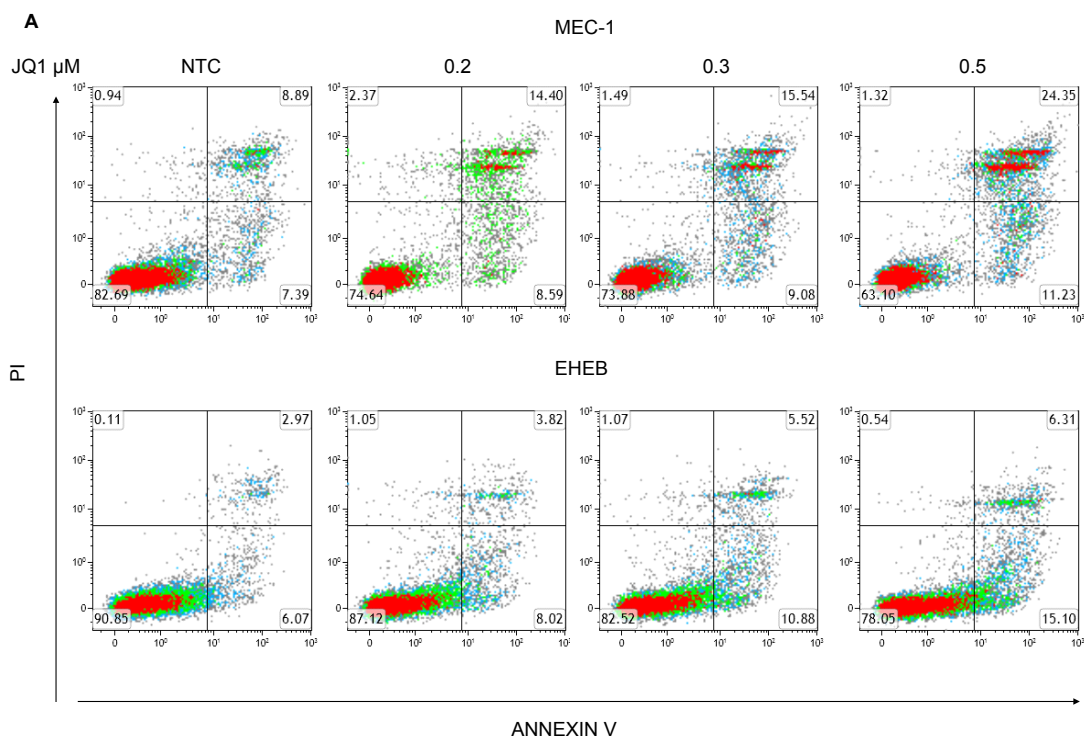

**Supplementary Figure S1: Cytometric analysis of MEC-1 and EHEB cell lines were treated with JQ1**

(A) Dot plot of flow cytometric analysis of MEC-1 and EHEB cell lines treated with the indicated concentrations of JQ1 for 48 hours.

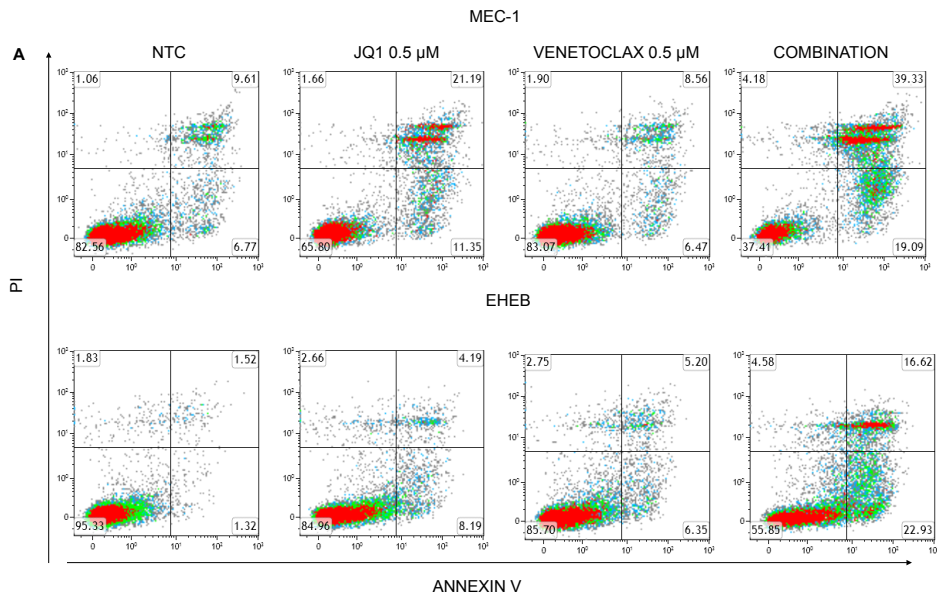

**B**

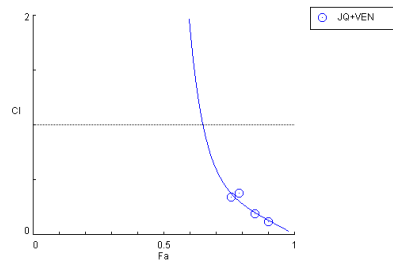

Combination Index

| Total Dose | Fa   | CI Value |
|------------|------|----------|
| 1.0        | 0.76 | 0.34726  |
| 1.5        | 0.85 | 0.18903  |
| 1.5        | 0.79 | 0.37720  |
| 2.0        | 0.9  | 0.12060  |

**Supplementary Figure S2: combined treatment with JQ1 and ibrutinib exerts synergistic lethal activity in CLL cell lines**

(A) Dot plot of flow cytometric analysis of MEC-1 and EHEB cell lines treated with the indicated concentrations of JQ and Venetoclax alone or in combination, for 48 hours. (B) CLL cells were treated with JQ1 and Venetoclax for 48 hours. The percent of nonviable cells was determined by CellTiter-Glo assay. Median dose effect and isobologram analyses were performed utilizing CalcuSyn. CI values 1.0 indicates a synergistic interaction of the two agents in the combination.

**A**

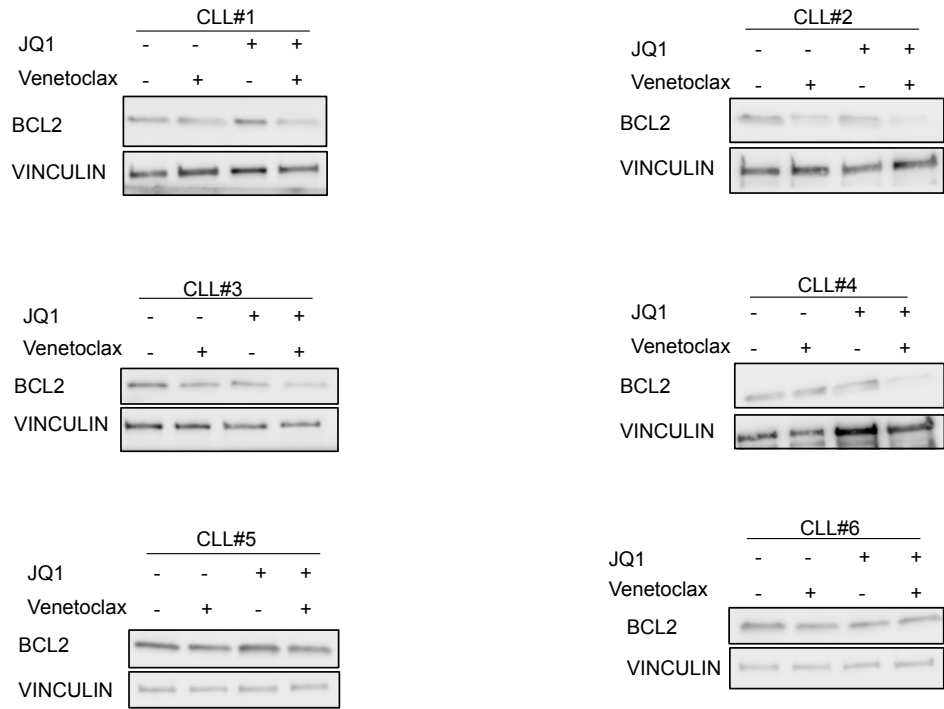

**Supplementary Figure S3: Full Western Immunoblot of CLL patients**

**A)** Western immunoblot of primary CLL cells treated with JQ1, Venetoclax and combination for 48 hours. Immunoblot analyses were conducted for the expression levels of BCL2.

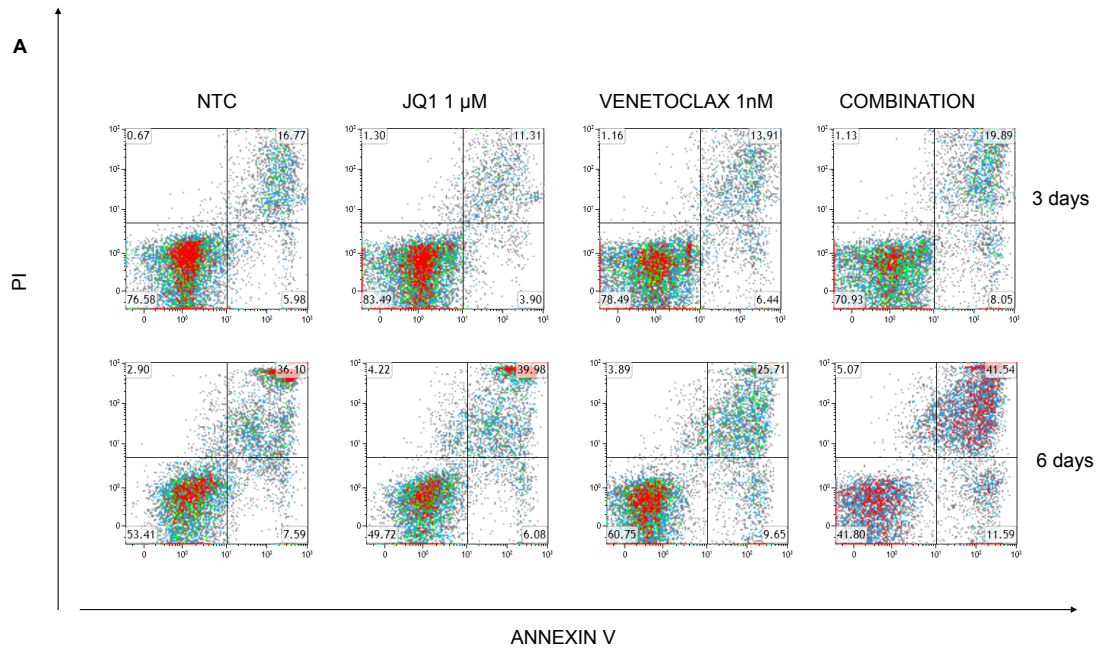

**B**

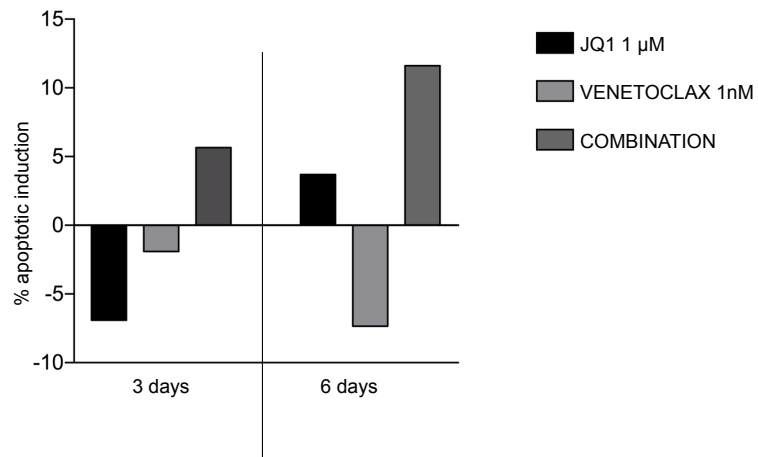

**Supplementary Figure S4: JQ1 re-sensitizes Venetoclax-resistant patients to venetoclax**

(A) Dot plot of flow cytometric analysis on the peripheral blood in Venetoclax-resistant patient cells. (B) Apoptosis-induction calculated on Venetoclax-resistant patient cells, treated with JQ1 and Venetoclax at indicated concentrations alone or in combination.

**TABLE 1: Patients features**

| Patient characteristic |     |     | Diagnosis |       |        |         |                                                                                                     | At the collection of the samples |      |         |                                                                                                                                  |                                                                       | Cytogenetics                  |                                           |                                                                                        |            |                                                                                                                                                                                                                                                                                                          | Therapy                                       |                                                                                                   | Follow up |
|------------------------|-----|-----|-----------|-------|--------|---------|-----------------------------------------------------------------------------------------------------|----------------------------------|------|---------|----------------------------------------------------------------------------------------------------------------------------------|-----------------------------------------------------------------------|-------------------------------|-------------------------------------------|----------------------------------------------------------------------------------------|------------|----------------------------------------------------------------------------------------------------------------------------------------------------------------------------------------------------------------------------------------------------------------------------------------------------------|-----------------------------------------------|---------------------------------------------------------------------------------------------------|-----------|
| code                   | age | sex | stage Rai | WBC   | Hb     | PLTS    | adenopathy                                                                                          | WBC                              | Hb   | PLTS    | adenopathy                                                                                                                       | CD38/ZAP70                                                            | TP53 status                   | IGVH                                      | cytog. (FISH)                                                                          | trisomy 12 | yes/no/WW                                                                                                                                                                                                                                                                                                | FCR/BTK...                                    |                                                                                                   |           |
| #1                     | 79  | M   | 0         | 17000 | normal | normal  | not significant                                                                                     | 134800                           | 13.5 | 127.000 | spleen 17.5 cm, lfn ltc max 3 cm ltc, small inguinal lfn                                                                         | At diagnosis, CD38 neg; in 2003, bimodal CD38; in 2005, CD38+, ZAP70+ | NA at diagnosis, 2019 ongoing | unmut                                     | del13q14.3                                                                             | no         | ww until 2005; 2005: FC --> good PR, allergic reaction --> stop; 2008: R-OxDA, 2011: LDT+6 months, Benda; 2013: leukeran; 2014: oxDHA --> PR --> ibrutinib 2015, PR; 2018: PD for leukocytosis --> venetoclax from 2019.                                                                                 | ibrutinib 2015-2018; 2018: venetoclax         | 2019: MMR 0,002%                                                                                  |           |
| #2                     | 71  | F   | 1         | 49500 | 12,9   | 284.000 | axillary max 40 mm, paratracheal 25 mm. Interpectoral crural, paraortic, iliac, obturator max 25 mm | na                               | na   | na      | as diagnosis                                                                                                                     | CD38 neg, ZAP70 neg                                                   | NA                            | unmut                                     | del17p, del13 at diagnosis. In 2011, also monosomy 17.                                 | no         | 2010: oxDHA, 2012: EPOCH --> PD --> OxDHA. Worsening clinical conditions --> leukeran.                                                                                                                                                                                                                   | no                                            | lost to fu, likely dead.                                                                          |           |
| #3                     | 74  | F   | 1         | 6230  | 12     | 198.000 | ltc 5-20 mm, axillary 30 mm, several abdominal 30mm, lomboarctic tissue 60 mm, iliac max 20 mm.     | 2180                             | 11   | 147.000 | during treatment (very good partial response)                                                                                    | CD38 neg, ZAP70 borderline                                            | neg                           | NA                                        | del11                                                                                  | no         | bendamustin from 2017, then discovery of lung cancer --> stop after 4 cycles.                                                                                                                                                                                                                            | no                                            | ongoing therapy for lung cancer. CLL still in very good partial remission                         |           |
| #4                     | 70  | F   | 0         | 15900 | 14,3   | 262.000 | not significant                                                                                     | 166000                           | 13,1 | 247.000 | Hepatic hilum: adenopathic mass 85 mm; lymphnodes above pancreas max 32 mm; common iliac an max 24 mm, external iliac max 18 mm. | CD38 neg, ZAP70 neg                                                   | NA                            | 3 rearrangement s: 2 mutated, 1 unmutated | at diagnosis: normal                                                                   | no         | ww                                                                                                                                                                                                                                                                                                       | no                                            | 2019: alive, leukocytosis slowly progressive (WBC 90.000), no anemia or pfts reduction.           |           |
| #5                     | 79  | F   | 0         | 15420 | normal | normal  | not significant                                                                                     | 6720                             | 13,9 | 140.000 | 2017: axillary max 40 mm, laterocervical max 20 mm                                                                               | CD38pos, ZAP70 pos                                                    | wt                            | unmut                                     | trisomy 12 at diagnosis, 2015: trisomy 12, del 11q (ATM), 2017: t(12, del 11q, del 17p | yes        | 2010: progression (adenopathies and LDT< 6 months) --> R-Benda, RC. 2015: relapse, lymphocytosis --> R-benda, good PR. 2017: relapse, hyperleukocytosis and AIHA; R-CVP, then ibrutinib from 2017. Hyperleukocytosis and suspected Richter Sy. from 2019: OxDHA, brief response --> Venetoclax from 2019 | ibrutinib 2017 --> 2019, venetoclax from 2019 | just started                                                                                      |           |
| #6                     | 68  | M   | 0         | 24300 | 14,3   | 229.000 | 14mm ltc                                                                                            | 6010                             | 13,3 | 131.000 | CR at the end of treatment                                                                                                       | CD38 pos, ZAP70 border line                                           | wt                            | 1 mut clone and 1 unmut clone             | wt                                                                                     | no         | ww till 2017, when the patient was treated with 6 cycles of R-Bendamustine for adenopathic progression and thrombocytopenia (65.000) --> CR                                                                                                                                                              | no                                            | CR                                                                                                |           |
| #7                     | 81  | F   | 1         | 24960 | 14,2   | 296.000 | ltc max 17mm, axillary mas 18mm, inguinal max 30mm, hepatic hilum 38mm, interaorticaval 26mm        | 10290                            | 13,3 | 292.000 | periportal lfn 16 mm                                                                                                             | CD38 neg, ZAP70 neg.                                                  | NA                            | unmut                                     | del 11q (ATM) and del 13q                                                              | no         | ww Adenopathic progression --> 2016: R-ibrutinib (Genema LLC 1114).                                                                                                                                                                                                                                      | yes, ibrutinib from 2016, CR                  | CR in ibrutinib                                                                                   |           |
| #8                     | 68  | F   | 0         | 19120 | 14,1   | 244.000 | not significant                                                                                     | 18790                            | 14,1 | 191.000 | spleen 12 cm, not significant lymphadenopathies.                                                                                 | CD38 neg, ZAP70 neg.                                                  | mut                           | mut                                       | del13 at diagnosis, 2015: p53 mut, del 17p 10%.                                        | no         | Hyperleukocytosis and anemia --> R-benda in 2013. PD in 2015, p53 mut, del17 10% --> ibrutinib 2015, good PR                                                                                                                                                                                             | yes, ibrutinib from 2015                      | pneumonia in 2017 --> ibrutinib suspension. CLL not requiring treatment (GB 49870, spleen 15 cm). |           |
| #9                     | 73  | M   | 0         | 10500 | 14,1   | 172.000 | not significant                                                                                     | 2730                             | 12,6 | 80.000  | sample taken during treatment, pre treatment, in October, diffuse adenopathies max 3 cm. Spleen 20 cm, equatorially              | CD38 neg, ZAP70 neg.                                                  | wt                            | mut                                       | NA (del17 neg, other exams not available)                                              | no         | ww 2002-2009, 2009: FCR for splenomegaly (20 cm and thrombocytopenia 97.000); 2 cycles, then stop for pneumonia. PD in 2017 --> R-benda --> CR                                                                                                                                                           | no                                            | CR                                                                                                |           |
